# Supplementary material
Source: publisher figshare collection journal article supplement (https://acs.figshare.com/ndownloader/files/5092837)
Supplement: Supplementary file 1 [file 5092837]

data_TTDPzAlCl 
 
_audit_creation_method            SHELXL-97 
_chemical_name_common             Porphyrazinealuminiumchloride 
_chemical_formula_sum             'C16 Al Cl N16 S4 ' 
_chemical_formula_weight          606.99  
 
loop_ 
 _atom_type_symbol 
 _atom_type_description 
 _atom_type_scat_dispersion_real 
 _atom_type_scat_dispersion_imag 
 _atom_type_scat_source 
 'Al'  'Al'   0.0645   0.0514 
 'International Tables Vol C Tables 4.2.6.8 and 6.1.1.4' 
 'Cl'  'Cl'   0.1484   0.1585 
 'International Tables Vol C Tables 4.2.6.8 and 6.1.1.4' 
 'S'  'S'   0.1246   0.1234 
 'International Tables Vol C Tables 4.2.6.8 and 6.1.1.4' 
 'N'  'N'   0.0061   0.0033 
 'International Tables Vol C Tables 4.2.6.8 and 6.1.1.4' 
 'C'  'C'   0.0033   0.0016 
 'International Tables Vol C Tables 4.2.6.8 and 6.1.1.4' 
 
_symmetry_cell_setting            triclinic 
_symmetry_space_group_name_H-M    P-1 
 
loop_ 
 _symmetry_equiv_pos_as_xyz 
 'x, y, z' 
 '-x, -y, -z' 
 
_cell_length_a                    12.470(14) 
_cell_length_b                    12.464(13) 
_cell_length_c                    13.947(12) 
_cell_angle_alpha                 70.72(3) 
_cell_angle_beta                  79.76(3) 
_cell_angle_gamma                 90.06(3) 
_cell_volume                      2009(3) 
_cell_formula_units_Z             4 
_cell_measurement_temperature     173(2) 
_cell_measurement_reflns_used     5463
_cell_measurement_theta_min       3.0448
_cell_measurement_theta_max       27.4835
 
_exptl_crystal_description        block 
_exptl_crystal_colour             purple 
_exptl_crystal_size_max           0.20 
_exptl_crystal_size_mid           0.20 
_exptl_crystal_size_min           0.20 
_exptl_crystal_density_diffrn     2.006 
_exptl_crystal_density_method     'not measured' 
_exptl_crystal_F_000              1208 
_exptl_absorpt_coefficient_mu     0.703 
_exptl_absorpt_correction_type    'Multi-scan'
_exptl_absorpt_correction_T_max   1.0 
_exptl_absorpt_correction_T_min   0.9621 
 
_diffrn_ambient_temperature       173(2) 
_diffrn_radiation_wavelength      0.71070 
_diffrn_radiation_type            MoK\a 
_diffrn_radiation_source          'fine-focus sealed tube' 
_diffrn_radiation_monochromator   graphite 
_diffrn_measurement_device_type   'Rigaku Mercury CCD' 
_diffrn_measurement_method        \w
_diffrn_reflns_number             9810 
_diffrn_reflns_av_R_equivalents   0.0622 
_diffrn_reflns_av_sigmaI/netI     0.0786 
_diffrn_reflns_limit_h_min        -13 
_diffrn_reflns_limit_h_max        13 
_diffrn_reflns_limit_k_min        -13 
_diffrn_reflns_limit_k_max        13 
_diffrn_reflns_limit_l_min        -13 
_diffrn_reflns_limit_l_max        15 
_diffrn_reflns_theta_min          3.04 
_diffrn_reflns_theta_max          22.50 
_reflns_number_total              5126 
_reflns_number_gt                 4209 
_reflns_threshold_expression      >2sigma(I) 
 
_computing_structure_solution     'SHELXS-97 (Sheldrick, 1990)' 
_computing_structure_refinement   'SHELXL-97 (Sheldrick, 1997)' 
_computing_molecular_graphics     'ORTEP 3 for windows'
 
_refine_special_details 
; 
 Refinement of F^2^ against ALL reflections.  The weighted R-factor wR and 
 goodness of fit S are based on F^2^, conventional R-factors R are based 
 on F, with F set to zero for negative F^2^. The threshold expression of 
 F^2^ > 2sigma(F^2^) is used only for calculating R-factors(gt) etc. and is 
 not relevant to the choice of reflections for refinement.  R-factors based 
 on F^2^ are statistically about twice as large as those based on F, and R- 
 factors based on ALL data will be even larger. 
 
 Isotropic thermal factors were applied to some atoms except Al and Cl atoms.
 Highest residual electron peaks were 3.41 e/A^3 at distances of 0.70 A from 
 nitrogen atoms owing to its bad crystallinity. 
; 
 
_refine_ls_structure_factor_coef  Fsqd  
_refine_ls_matrix_type            full 
_refine_ls_weighting_scheme       calc  
_refine_ls_weighting_details 
 'calc w=1/[\s^2^(Fo^2^)+(0.2000P)^2^+0.0000P] where P=(Fo^2^+2Fc^2^)/3' 
_atom_sites_solution_primary      direct 
_atom_sites_solution_secondary    difmap 
_refine_ls_extinction_method      SHELXL 
_refine_ls_extinction_coef        0.027(9) 
_refine_ls_extinction_expression 
 'Fc^*^=kFc[1+0.001xFc^2^\l^3^/sin(2\q)]^-1/4^' 
_refine_ls_number_reflns          5126 
_refine_ls_number_parameters      481 
_refine_ls_number_restraints      0 
_refine_ls_R_factor_all           0.1719 
_refine_ls_R_factor_gt            0.1626 
_refine_ls_wR_factor_ref          0.4738 
_refine_ls_wR_factor_gt           0.4681 
_refine_ls_goodness_of_fit_ref    2.065 
_refine_ls_restrained_S_all       2.065 
_refine_ls_shift/su_max           0.002 
_refine_ls_shift/su_mean          0.000 
 
loop_ 
 _atom_site_label 
 _atom_site_type_symbol 
 _atom_site_fract_x 
 _atom_site_fract_y 
 _atom_site_fract_z 
 _atom_site_U_iso_or_equiv 
 _atom_site_adp_type 
 _atom_site_occupancy 
 _atom_site_symmetry_multiplicity 
 _atom_site_calc_flag 
 _atom_site_refinement_flags 
 _atom_site_disorder_assembly 
 _atom_site_disorder_group 
Al1 Al 0.5755(3) 0.4189(3) 0.3377(3) 0.0111(11) Uani 1 1 d . . . 
Al2 Al 1.1104(3) -0.0156(3) 0.1627(3) 0.0109(11) Uani 1 1 d . . . 
S3 S 0.6647(3) 0.2410(3) 0.1117(3) 0.0199(11) Uani 1 1 d . . . 
S4 S 1.0204(3) 0.1636(3) 0.3935(3) 0.0215(11) Uani 1 1 d . . . 
S6 S 1.3561(3) 0.4619(3) 0.1059(3) 0.0183(10) Uani 1 1 d . . . 
S7 S 0.8874(3) -0.4517(3) 0.1067(3) 0.0203(10) Uani 1 1 d . . . 
S9 S 0.1071(3) 0.6316(3) 0.3935(3) 0.0188(10) Uani 1 1 d . . . 
S10 S 1.5732(3) -0.2383(3) 0.1289(3) 0.0198(11) Uani 1 1 d . . . 
Cl1 Cl 0.6087(2) 0.4835(3) 0.1696(2) 0.0164(10) Uani 1 1 d . . . 
N11 N 1.4065(8) 0.3373(8) 0.1093(7) 0.007(2) Uiso 1 1 d . . . 
C7 C 1.3008(10) 0.1566(10) 0.1238(9) 0.009(3) Uiso 1 1 d . . . 
N9 N 0.7821(9) 0.2845(9) 0.1225(9) 0.022(3) Uani 1 1 d . . . 
N1 N 0.1362(8) 0.5090(9) 0.3820(7) 0.011(2) Uiso 1 1 d . . . 
C5 C 0.3914(10) 0.2539(11) 0.3638(10) 0.020(3) Uani 1 1 d . . . 
C8 C 1.1362(11) 0.2361(11) 0.1328(10) 0.015(3) Uani 1 1 d . . . 
N17 N 0.6514(9) 0.1458(10) 0.3749(8) 0.021(3) Uani 1 1 d . . . 
N2 N 0.2260(9) 0.6843(10) 0.3940(8) 0.020(3) Uiso 1 1 d . . . 
N6 N 0.4997(8) 0.2696(9) 0.3672(7) 0.015(3) Uani 1 1 d . . . 
C11 C 0.8936(11) 0.3063(11) 0.3715(11) 0.020(3) Uani 1 1 d . . . 
N10 N 0.6928(8) 0.1136(9) 0.1073(7) 0.013(2) Uiso 1 1 d . . . 
C4 C 0.4097(11) 0.5856(11) 0.3789(10) 0.021(3) Uani 1 1 d . . . 
N15 N 0.8995(9) 0.1122(9) 0.3888(8) 0.018(3) Uiso 1 1 d . . . 
N4 N 0.4846(9) 0.6619(9) 0.3865(8) 0.016(3) Uani 1 1 d . . . 
N13 N 1.3782(8) 0.0843(9) 0.1202(7) 0.012(2) Uiso 1 1 d . . . 
N18 N 0.7073(9) 0.3344(9) 0.3669(8) 0.017(3) Uani 1 1 d . . . 
C12 C 0.7257(10) 0.2245(10) 0.3757(9) 0.011(3) Uiso 1 1 d . . . 
N19 N 1.1883(9) 0.1373(9) 0.1309(8) 0.017(3) Uani 1 1 d . . . 
N5 N 0.3099(9) 0.3244(9) 0.3640(8) 0.019(3) Uiso 1 1 d . . . 
N14 N 1.0325(8) 0.2553(9) 0.1380(8) 0.014(3) Uiso 1 1 d . . . 
C9 C 1.2191(10) 0.3217(11) 0.1257(9) 0.014(3) Uiso 1 1 d . . . 
N3 N 0.4306(9) 0.4767(10) 0.3723(8) 0.019(3) Uani 1 1 d . . . 
C13 C 0.8392(10) 0.2040(10) 0.3782(9) 0.010(3) Uiso 1 1 d . . . 
N12 N 1.2265(8) 0.4318(9) 0.1173(7) 0.011(2) Uiso 1 1 d . . . 
C6 C 0.5488(10) 0.1657(11) 0.3729(9) 0.015(3) Uiso 1 1 d . . . 
C14 C 0.8097(10) 0.3877(12) 0.3657(10) 0.018(3) Uani 1 1 d . . . 
N16 N 0.9942(10) 0.2927(11) 0.3827(9) 0.028(3) Uani 1 1 d . . . 
C1 C 0.2442(10) 0.5062(11) 0.3749(9) 0.011(3) Uiso 1 1 d . . . 
C10 C 1.3217(10) 0.2716(10) 0.1187(9) 0.011(3) Uiso 1 1 d . . . 
C2 C 0.2957(9) 0.6047(10) 0.3842(8) 0.009(3) Uiso 1 1 d . . . 
C3 C 0.3305(10) 0.4274(11) 0.3709(10) 0.014(3) Uani 1 1 d . . . 
Cl2 Cl 1.0765(3) -0.0788(3) 0.3303(2) 0.0171(10) Uani 1 1 d . . . 
N29 N 1.0101(8) -0.4277(9) 0.1175(7) 0.012(2) Uiso 1 1 d . . . 
N20 N 0.6405(8) 0.5487(9) 0.3720(7) 0.013(2) Uiso 1 1 d . . . 
N26 N 1.0448(9) -0.1421(9) 0.1287(7) 0.017(3) Uani 1 1 d . . . 
N30 N 0.8328(9) -0.3331(10) 0.1082(7) 0.017(3) Uani 1 1 d . . . 
N27 N 1.1988(8) -0.2643(9) 0.1370(8) 0.015(3) Uani 1 1 d . . . 
C20 C 0.9390(10) -0.1564(11) 0.1219(9) 0.015(3) Uiso 1 1 d . . . 
C17 C 0.9602(10) 0.1776(11) 0.1352(9) 0.016(3) Uani 1 1 d . . . 
C15 C 0.7709(10) 0.6772(10) 0.3732(9) 0.009(3) Uiso 1 1 d . . . 
C18 C 1.3583(11) -0.0205(11) 0.1267(9) 0.016(3) Uiso 1 1 d . . . 
C21 C 1.0969(10) -0.2431(11) 0.1327(9) 0.013(3) Uiso 1 1 d . . . 
N28 N 0.8602(9) -0.0807(9) 0.1124(7) 0.014(3) Uani 1 1 d . . . 
N22 N 0.9759(9) 0.0684(9) 0.1303(8) 0.015(3) Uiso 1 1 d . . . 
N21 N 0.8315(8) 0.4943(9) 0.3608(8) 0.015(3) Uiso 1 1 d . . . 
C16 C 0.7521(10) 0.5642(11) 0.3663(9) 0.017(3) Uiso 1 1 d . . . 
N23 N 1.2550(8) -0.0761(9) 0.1311(7) 0.013(2) Uiso 1 1 d . . . 
C29 C 1.0167(10) -0.3229(11) 0.1237(9) 0.014(3) Uiso 1 1 d . . . 
C22 C 0.6706(10) 0.7259(11) 0.3822(10) 0.016(3) Uiso 1 1 d . . . 
C24 C 0.4676(11) 0.0825(12) 0.3724(10) 0.021(3) Uiso 1 1 d . . . 
C31 C 1.4389(10) -0.1045(11) 0.1257(9) 0.013(3) Uiso 1 1 d . . . 
N31 N 1.4496(9) -0.2912(10) 0.1333(8) 0.021(3) Uani 1 1 d . . . 
C26 C 0.7973(10) 0.1068(10) 0.1172(9) 0.011(3) Uiso 1 1 d . . . 
N32 N 1.5453(9) -0.1101(10) 0.1226(8) 0.024(3) Uiso 1 1 d . . . 
C27 C 0.8468(10) 0.2009(11) 0.1289(9) 0.013(3) Uiso 1 1 d . . . 
C25 C 0.3669(10) 0.1385(10) 0.3684(9) 0.009(3) Uiso 1 1 d . . . 
C28 C 0.8788(10) 0.0218(11) 0.1200(9) 0.014(3) Uiso 1 1 d . . . 
C30 C 0.9176(10) -0.2682(10) 0.1149(9) 0.010(3) Uiso 1 1 d . . . 
C23 C 0.5866(11) 0.6418(11) 0.3816(10) 0.017(3) Uani 1 1 d . . . 
C32 C 1.3856(10) -0.2050(11) 0.1320(9) 0.016(3) Uiso 1 1 d . . . 
C33 C 1.2710(11) -0.1858(11) 0.1330(10) 0.016(3) Uiso 1 1 d . . . 
S11 S 0.8037(3) 0.8574(3) 0.3841(3) 0.0210(11) Uani 1 1 d . . . 
S12 S 0.3315(3) -0.0518(3) 0.3772(3) 0.0193(10) Uani 1 1 d . . . 
N33 N 0.8536(8) 0.7392(9) 0.3710(7) 0.011(2) Uiso 1 1 d . . . 
N35 N 0.4554(10) -0.0238(9) 0.3792(8) 0.021(3) Uani 1 1 d . . . 
N36 N 0.2807(10) 0.0707(11) 0.3694(9) 0.028(3) Uani 1 1 d . . . 
N34 N 0.6736(9) 0.8264(9) 0.3913(8) 0.019(3) Uiso 1 1 d . . . 
 
loop_ 
 _atom_site_aniso_label 
 _atom_site_aniso_U_11 
 _atom_site_aniso_U_22 
 _atom_site_aniso_U_33 
 _atom_site_aniso_U_23 
 _atom_site_aniso_U_13 
 _atom_site_aniso_U_12 
Al1 0.006(2) 0.014(2) 0.014(2) -0.0064(17) -0.0013(15) 0.0022(16) 
Al2 0.011(2) 0.005(2) 0.017(2) -0.0035(16) -0.0052(16) 0.0027(16) 
S3 0.015(2) 0.022(2) 0.030(2) -0.0152(16) -0.0112(15) 0.0098(15) 
S4 0.012(2) 0.019(2) 0.035(2) -0.0083(17) -0.0092(16) 0.0042(15) 
S6 0.017(2) 0.014(2) 0.025(2) -0.0080(15) -0.0060(15) -0.0008(15) 
S7 0.016(2) 0.014(2) 0.033(2) -0.0110(16) -0.0058(15) -0.0023(15) 
S9 0.0135(19) 0.015(2) 0.031(2) -0.0099(15) -0.0071(15) 0.0067(15) 
S10 0.0102(19) 0.019(2) 0.028(2) -0.0030(16) -0.0074(15) 0.0028(15) 
Cl1 0.0129(18) 0.0184(19) 0.0181(18) -0.0059(14) -0.0037(13) 0.0002(14) 
N9 0.019(6) 0.007(6) 0.032(7) 0.000(5) 0.000(5) 0.009(5) 
C5 0.013(8) 0.012(7) 0.021(7) 0.006(6) 0.012(6) 0.005(6) 
C8 0.019(7) 0.009(7) 0.021(7) -0.007(6) -0.014(6) 0.007(6) 
N17 0.015(6) 0.016(6) 0.028(7) 0.001(5) -0.007(5) 0.006(5) 
N6 0.013(6) 0.018(6) 0.011(5) -0.007(5) 0.006(4) 0.005(5) 
C11 0.015(8) 0.015(8) 0.036(8) -0.018(6) -0.001(6) 0.002(6) 
C4 0.021(8) 0.015(8) 0.016(7) 0.004(6) 0.004(6) -0.006(6) 
N4 0.020(7) 0.008(6) 0.015(6) -0.003(5) 0.010(5) 0.003(5) 
N18 0.012(6) 0.021(6) 0.022(6) -0.014(5) 0.000(5) 0.002(5) 
N19 0.015(6) 0.010(6) 0.026(6) -0.002(5) -0.009(5) 0.007(5) 
N3 0.011(6) 0.027(7) 0.015(6) -0.004(5) 0.004(5) -0.013(5) 
C14 0.008(7) 0.023(8) 0.018(7) -0.002(6) -0.001(5) 0.003(6) 
N16 0.016(7) 0.035(8) 0.035(7) -0.009(6) -0.014(5) 0.008(6) 
C3 0.007(7) 0.010(7) 0.028(7) -0.008(6) -0.009(6) -0.001(6) 
Cl2 0.0175(19) 0.0143(18) 0.0201(18) -0.0063(14) -0.0037(14) 0.0031(14) 
N26 0.021(6) 0.024(7) 0.004(5) -0.002(5) -0.001(4) -0.001(5) 
N30 0.020(6) 0.027(7) 0.006(5) -0.008(5) 0.000(5) -0.003(5) 
N27 0.009(6) 0.016(6) 0.030(6) -0.015(5) -0.014(5) 0.008(5) 
C17 0.014(7) 0.020(8) 0.008(6) 0.000(5) 0.006(5) -0.001(6) 
N28 0.014(6) 0.016(6) 0.010(5) -0.001(5) -0.003(4) 0.000(5) 
N31 0.017(6) 0.023(7) 0.026(6) -0.010(5) -0.009(5) 0.008(5) 
C23 0.020(8) 0.016(8) 0.021(7) -0.013(6) -0.005(6) 0.014(6) 
S11 0.020(2) 0.014(2) 0.031(2) -0.0105(16) -0.0035(16) -0.0028(15) 
S12 0.019(2) 0.013(2) 0.030(2) -0.0104(16) -0.0090(16) 0.0016(15) 
N35 0.028(7) 0.015(6) 0.023(6) -0.003(5) -0.016(5) 0.009(5) 
N36 0.024(7) 0.038(8) 0.025(6) -0.015(6) -0.002(5) 0.020(6) 
 
_geom_special_details 
; 
 All esds (except the esd in the dihedral angle between two l.s. planes) 
 are estimated using the full covariance matrix.  The cell esds are taken 
 into account individually in the estimation of esds in distances, angles 
 and torsion angles; correlations between esds in cell parameters are only 
 used when they are defined by crystal symmetry.  An approximate (isotropic) 
 treatment of cell esds is used for estimating esds involving l.s. planes. 
; 
 
loop_ 
 _geom_bond_atom_site_label_1 
 _geom_bond_atom_site_label_2 
 _geom_bond_distance 
 _geom_bond_site_symmetry_2 
 _geom_bond_publ_flag 
Al1 N6 1.970(11) . ? 
Al1 N18 1.984(11) . ? 
Al1 N3 1.985(12) . ? 
Al1 N20 2.037(11) . ? 
Al1 Cl1 2.173(5) . ? 
Al2 N23 1.988(11) . ? 
Al2 N26 2.003(11) . ? 
Al2 N19 2.014(11) . ? 
Al2 N22 2.019(11) . ? 
Al2 Cl2 2.168(5) . ? 
S3 N9 1.609(12) . ? 
S3 N10 1.646(11) . ? 
S4 N16 1.605(13) . ? 
S4 N15 1.658(11) . ? 
S6 N12 1.627(10) . ? 
S6 N11 1.665(10) . ? 
S7 N29 1.601(11) . ? 
S7 N30 1.633(12) . ? 
S9 N2 1.623(11) . ? 
S9 N1 1.624(11) . ? 
S10 N32 1.613(12) . ? 
S10 N31 1.659(12) . ? 
N11 C10 1.298(15) . ? 
C7 N13 1.327(15) . ? 
C7 N19 1.404(16) . ? 
C7 C10 1.432(17) . ? 
N9 C27 1.308(16) . ? 
N1 C1 1.333(16) . ? 
C5 N5 1.345(16) . ? 
C5 N6 1.375(17) . ? 
C5 C25 1.448(18) . ? 
C8 N14 1.309(16) . ? 
C8 N19 1.399(16) . ? 
C8 C9 1.452(18) . ? 
N17 C6 1.307(17) . ? 
N17 C12 1.353(16) . ? 
N2 C2 1.345(16) . ? 
N6 C6 1.417(16) . ? 
C11 N16 1.296(18) . ? 
C11 C13 1.411(18) . ? 
C11 C14 1.452(18) . ? 
N10 C26 1.334(16) . ? 
C4 N4 1.374(17) . ? 
C4 N3 1.411(18) . ? 
C4 C2 1.434(18) . ? 
N15 C13 1.351(16) . ? 
N4 C23 1.291(17) . ? 
N13 C18 1.299(16) . ? 
N18 C12 1.358(16) . ? 
N18 C14 1.432(16) . ? 
C12 C13 1.443(17) . ? 
N5 C3 1.347(17) . ? 
N14 C17 1.336(16) . ? 
C9 N12 1.340(16) . ? 
C9 C10 1.426(17) . ? 
N3 C3 1.397(15) . ? 
C6 C24 1.451(18) . ? 
C14 N21 1.333(17) . ? 
C1 C2 1.439(17) . ? 
C1 C3 1.465(17) . ? 
N29 C29 1.340(16) . ? 
N20 C23 1.374(16) . ? 
N20 C16 1.390(16) . ? 
N26 C20 1.355(16) . ? 
N26 C21 1.407(16) . ? 
N30 C30 1.365(15) . ? 
N27 C21 1.306(16) . ? 
N27 C33 1.310(16) . ? 
C20 N28 1.356(16) . ? 
C20 C30 1.456(17) . ? 
C17 N22 1.398(17) . ? 
C17 C27 1.457(18) . ? 
C15 N33 1.278(15) . ? 
C15 C22 1.394(17) . ? 
C15 C16 1.463(18) . ? 
C18 N23 1.444(16) . ? 
C18 C31 1.454(17) . ? 
C21 C29 1.459(17) . ? 
N28 C28 1.339(17) . ? 
N22 C28 1.392(16) . ? 
N21 C16 1.328(17) . ? 
N23 C33 1.375(17) . ? 
C29 C30 1.418(17) . ? 
C22 N34 1.302(17) . ? 
C22 C23 1.484(18) . ? 
C24 N35 1.303(17) . ? 
C24 C25 1.438(18) . ? 
C31 N32 1.323(17) . ? 
C31 C32 1.386(18) . ? 
N31 C32 1.336(16) . ? 
C26 C27 1.393(18) . ? 
C26 C28 1.466(17) . ? 
C25 N36 1.362(17) . ? 
C32 C33 1.448(18) . ? 
S11 N34 1.645(11) . ? 
S11 N33 1.653(11) . ? 
S12 N35 1.591(12) . ? 
S12 N36 1.631(12) . ? 
 
loop_ 
 _geom_angle_atom_site_label_1 
 _geom_angle_atom_site_label_2 
 _geom_angle_atom_site_label_3 
 _geom_angle 
 _geom_angle_site_symmetry_1 
 _geom_angle_site_symmetry_3 
 _geom_angle_publ_flag 
N6 Al1 N18 86.6(5) . . ? 
N6 Al1 N3 87.8(5) . . ? 
N18 Al1 N3 155.9(5) . . ? 
N6 Al1 N20 156.2(4) . . ? 
N18 Al1 N20 89.0(4) . . ? 
N3 Al1 N20 86.9(5) . . ? 
N6 Al1 Cl1 101.8(3) . . ? 
N18 Al1 Cl1 101.5(3) . . ? 
N3 Al1 Cl1 102.6(3) . . ? 
N20 Al1 Cl1 101.9(3) . . ? 
N23 Al2 N26 87.4(5) . . ? 
N23 Al2 N19 88.2(5) . . ? 
N26 Al2 N19 155.6(4) . . ? 
N23 Al2 N22 156.2(4) . . ? 
N26 Al2 N22 87.0(5) . . ? 
N19 Al2 N22 87.4(4) . . ? 
N23 Al2 Cl2 101.8(3) . . ? 
N26 Al2 Cl2 102.2(3) . . ? 
N19 Al2 Cl2 102.2(3) . . ? 
N22 Al2 Cl2 102.0(3) . . ? 
N9 S3 N10 99.8(5) . . ? 
N16 S4 N15 100.5(6) . . ? 
N12 S6 N11 100.9(5) . . ? 
N29 S7 N30 101.8(5) . . ? 
N2 S9 N1 101.9(6) . . ? 
N32 S10 N31 99.6(6) . . ? 
C10 N11 S6 104.4(8) . . ? 
N13 C7 N19 127.7(11) . . ? 
N13 C7 C10 123.7(11) . . ? 
N19 C7 C10 108.6(11) . . ? 
C27 N9 S3 107.7(9) . . ? 
C1 N1 S9 105.2(8) . . ? 
N5 C5 N6 130.3(13) . . ? 
N5 C5 C25 119.1(12) . . ? 
N6 C5 C25 110.4(11) . . ? 
N14 C8 N19 129.1(12) . . ? 
N14 C8 C9 123.0(12) . . ? 
N19 C8 C9 107.9(11) . . ? 
C6 N17 C12 122.7(12) . . ? 
C2 N2 S9 105.2(9) . . ? 
C5 N6 C6 107.6(10) . . ? 
C5 N6 Al1 124.4(9) . . ? 
C6 N6 Al1 126.8(8) . . ? 
N16 C11 C13 112.0(13) . . ? 
N16 C11 C14 142.3(13) . . ? 
C13 C11 C14 105.1(12) . . ? 
C26 N10 S3 103.3(8) . . ? 
N4 C4 N3 126.1(12) . . ? 
N4 C4 C2 123.0(12) . . ? 
N3 C4 C2 110.7(11) . . ? 
C13 N15 S4 102.0(8) . . ? 
C23 N4 C4 121.3(12) . . ? 
C18 N13 C7 123.3(11) . . ? 
C12 N18 C14 106.6(10) . . ? 
C12 N18 Al1 129.0(8) . . ? 
C14 N18 Al1 123.7(9) . . ? 
N17 C12 N18 125.8(11) . . ? 
N17 C12 C13 123.5(12) . . ? 
N18 C12 C13 110.6(11) . . ? 
C8 N19 C7 109.0(10) . . ? 
C8 N19 Al2 124.5(8) . . ? 
C7 N19 Al2 125.4(8) . . ? 
C5 N5 C3 119.0(12) . . ? 
C8 N14 C17 121.0(12) . . ? 
N12 C9 C10 114.0(11) . . ? 
N12 C9 C8 138.6(12) . . ? 
C10 C9 C8 107.2(11) . . ? 
C3 N3 C4 106.4(11) . . ? 
C3 N3 Al1 125.2(9) . . ? 
C4 N3 Al1 126.9(8) . . ? 
N15 C13 C11 116.8(11) . . ? 
N15 C13 C12 135.1(11) . . ? 
C11 C13 C12 108.0(11) . . ? 
C9 N12 S6 104.8(9) . . ? 
N17 C6 N6 126.9(12) . . ? 
N17 C6 C24 123.7(13) . . ? 
N6 C6 C24 109.4(11) . . ? 
N21 C14 N18 128.5(12) . . ? 
N21 C14 C11 121.8(12) . . ? 
N18 C14 C11 109.7(11) . . ? 
C11 N16 S4 108.5(10) . . ? 
N1 C1 C2 114.2(11) . . ? 
N1 C1 C3 139.8(12) . . ? 
C2 C1 C3 105.6(10) . . ? 
N11 C10 C9 115.8(11) . . ? 
N11 C10 C7 136.8(12) . . ? 
C9 C10 C7 107.3(11) . . ? 
N2 C2 C4 139.8(12) . . ? 
N2 C2 C1 113.5(10) . . ? 
C4 C2 C1 106.8(11) . . ? 
N5 C3 N3 128.1(12) . . ? 
N5 C3 C1 121.4(11) . . ? 
N3 C3 C1 110.4(11) . . ? 
C29 N29 S7 107.0(9) . . ? 
C23 N20 C16 111.6(10) . . ? 
C23 N20 Al1 125.2(8) . . ? 
C16 N20 Al1 121.9(8) . . ? 
C20 N26 C21 109.2(10) . . ? 
C20 N26 Al2 126.3(9) . . ? 
C21 N26 Al2 123.0(8) . . ? 
C30 N30 S7 103.6(8) . . ? 
C21 N27 C33 121.8(12) . . ? 
N26 C20 N28 129.5(12) . . ? 
N26 C20 C30 110.3(11) . . ? 
N28 C20 C30 120.0(11) . . ? 
N14 C17 N22 129.7(12) . . ? 
N14 C17 C27 122.5(12) . . ? 
N22 C17 C27 107.7(11) . . ? 
N33 C15 C22 115.6(11) . . ? 
N33 C15 C16 136.2(12) . . ? 
C22 C15 C16 108.2(11) . . ? 
N13 C18 N23 128.1(12) . . ? 
N13 C18 C31 126.0(12) . . ? 
N23 C18 C31 105.9(10) . . ? 
N27 C21 N26 128.9(11) . . ? 
N27 C21 C29 123.8(12) . . ? 
N26 C21 C29 107.1(10) . . ? 
C28 N28 C20 120.3(11) . . ? 
C28 N22 C17 109.6(10) . . ? 
C28 N22 Al2 126.3(8) . . ? 
C17 N22 Al2 123.0(8) . . ? 
C16 N21 C14 121.1(12) . . ? 
N21 C16 N20 130.6(12) . . ? 
N21 C16 C15 122.8(12) . . ? 
N20 C16 C15 106.5(11) . . ? 
C33 N23 C18 109.2(10) . . ? 
C33 N23 Al2 125.0(8) . . ? 
C18 N23 Al2 124.4(8) . . ? 
N29 C29 C30 112.5(11) . . ? 
N29 C29 C21 139.7(12) . . ? 
C30 C29 C21 107.8(11) . . ? 
N34 C22 C15 115.5(12) . . ? 
N34 C22 C23 137.4(12) . . ? 
C15 C22 C23 107.0(11) . . ? 
N35 C24 C25 112.4(12) . . ? 
N35 C24 C6 141.5(13) . . ? 
C25 C24 C6 106.0(12) . . ? 
N32 C31 C32 114.3(12) . . ? 
N32 C31 C18 137.3(12) . . ? 
C32 C31 C18 108.4(11) . . ? 
C32 N31 S10 104.2(9) . . ? 
N10 C26 C27 116.5(11) . . ? 
N10 C26 C28 135.9(11) . . ? 
C27 C26 C28 107.6(11) . . ? 
C31 N32 S10 106.6(10) . . ? 
N9 C27 C26 112.5(11) . . ? 
N9 C27 C17 139.5(12) . . ? 
C26 C27 C17 107.7(11) . . ? 
N36 C25 C24 113.6(11) . . ? 
N36 C25 C5 139.7(12) . . ? 
C24 C25 C5 106.6(11) . . ? 
N28 C28 N22 128.0(12) . . ? 
N28 C28 C26 124.6(12) . . ? 
N22 C28 C26 107.4(10) . . ? 
N30 C30 C29 115.1(11) . . ? 
N30 C30 C20 139.4(12) . . ? 
C29 C30 C20 105.4(11) . . ? 
N4 C23 N20 130.7(12) . . ? 
N4 C23 C22 122.6(12) . . ? 
N20 C23 C22 106.7(11) . . ? 
N31 C32 C31 115.2(12) . . ? 
N31 C32 C33 136.6(12) . . ? 
C31 C32 C33 108.2(12) . . ? 
N27 C33 N23 128.6(12) . . ? 
N27 C33 C32 123.1(12) . . ? 
N23 C33 C32 108.3(11) . . ? 
N34 S11 N33 99.0(5) . . ? 
N35 S12 N36 100.7(6) . . ? 
C15 N33 S11 105.3(8) . . ? 
C24 N35 S12 108.9(10) . . ? 
C25 N36 S12 104.4(9) . . ? 
C22 N34 S11 104.6(9) . . ? 
 
_diffrn_measured_fraction_theta_max    0.976 
_diffrn_reflns_theta_full              22.50 
_diffrn_measured_fraction_theta_full   0.976 
_refine_diff_density_max    3.405 
_refine_diff_density_min   -1.988 
_refine_diff_density_rms    0.339 
